# Supplementary material
Source: Springer Nature journal article supplement (https://www.springermedizin.de/resource/supplementary/12943_2009_559_MOESM9_ESM.pdf/9554970)

### CYP1B1 B-ALL Samples

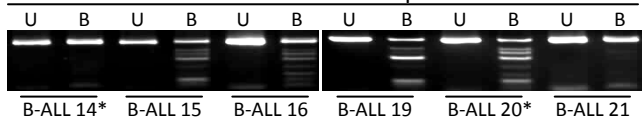

### CYP1B1 T-ALL Samples

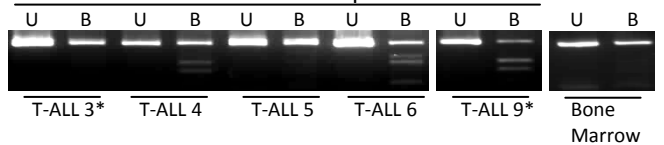

### EYA2 B-ALL Samples

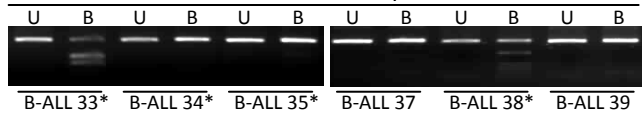

### EYA2 T-ALL Samples

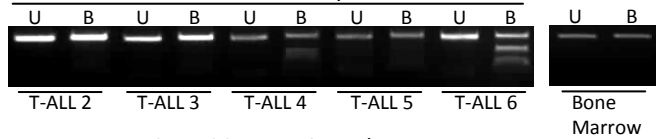

### GPR123 B-ALL Samples

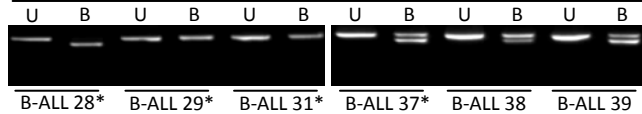

### GPR123 T-ALL Samples

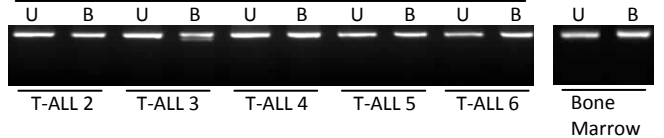

### KNDC1 B-ALL Samples

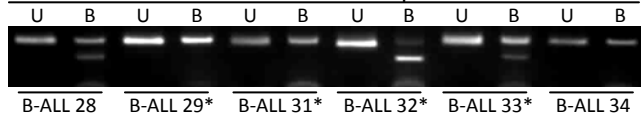

### KNDC1 T-ALL Samples

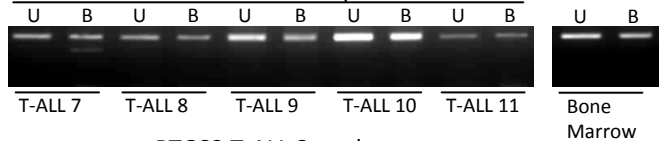

### PTGS2 B-ALL Samples

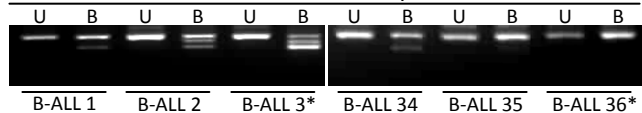

### PTGS2 T-ALL Samples

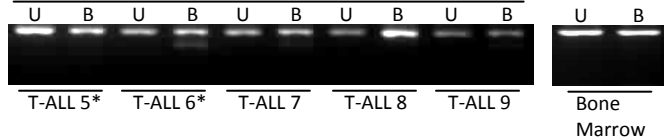

### TFAP2A B-ALL Samples

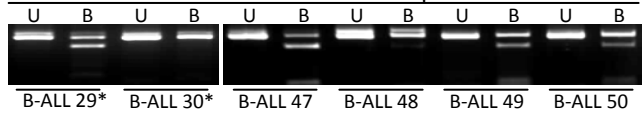

### TFAP2A T-ALL Samples

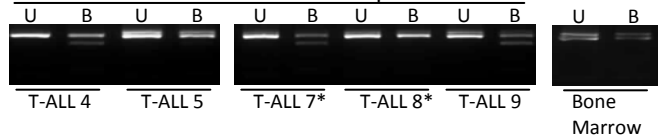

### TFAP2C B-ALL Samples

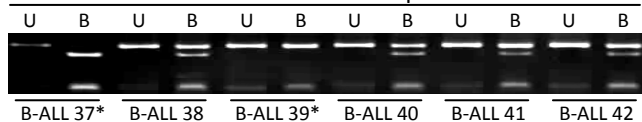

### TFAP2C T-ALL Samples

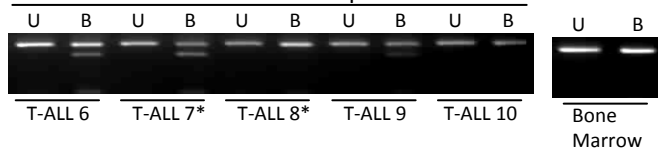

Supplement: MOESM9 [file 9554970]
